# Supplementary material for: Proteome Dynamics During Transition From Exponential to Stationary Phase Under Aerobic and Anaerobic Conditions in Yeast
Source: PubMed Central journal article supplement (PMC10227427; doi:10.1016/j.mcpro.2023.100552), 2023-04-17
Supplement: mmc1.pdf [file mmc1.pdf]

**Additional information to reviewer access for mass spectrometric raw data:**

**Proteome dynamics during transition from exponential to stationary phase under aerobic and anaerobic conditions in yeast**

Maxime den Ridder, Wiebeke van den Brandeler, Meryem Altiner, Pascale Daran-Lapujade\* and Martin Pabst\*  
Delft University of Technology, Department of Biotechnology, van der Maasweg 9, 2629 HZ Delft, The Netherlands  
\*Contacts: P.A.S.Daran-Lapujade@tudelft.nl or m.pabst@tudelft.nl

**A. Access to raw data via ProteomeXchange server:**

|                           |                                                                                   |
|---------------------------|-----------------------------------------------------------------------------------|
| Reviewer account details: | <a href="https://www.ebi.ac.uk/pride/login">https://www.ebi.ac.uk/pride/login</a> |
| Project accession:        | PXD031412                                                                         |
| Username:                 | reviewer_pxd031412@ebi.ac.uk                                                      |
| Password:                 | LcsErtel                                                                          |
